# Supplementary material for: Analysis of Borehole Strain Anomalies Before the 2017 Jiuzhaigou Ms7.0 Earthquake Based on Graph Neural Network
Source: Copernicus journal article supplement (doi:10.5194/egusphere-2024-2025), 2024-07-10
Supplement: Supplementary file [file egusphere-2024-2025-AC2-supplement.pdf]

**Response to Reviewer:**

I am very grateful to your comments for the manuscript. Thank you for your advice. All your suggestions are very important. They have important guiding significance for our paper and our research work. We have revised the manuscript according to your comments. The response to each revision is listed as following:

**Comment 1**

While their manuscript provides a comprehensive overview of the techniques used, such as Variational Mode Decomposition (VMD) and Graph Wavenet Neural Network (GWN), it lacks a detailed justification for the choice of these specific methods over more traditional approaches. The manuscript would benefit from a clearer explanation of why these complex techniques were chosen and what specific advantages they offer when analysing borehole strain data, especially compared to simpler methods such as band filtering or traditional statistical models. For example, the use of VMD could be replaced by simpler signal processing methods, and the rationale for using a neural network for prediction, which could be achieved using conventional signal processing methods, is not convincingly presented.

**Response:**

Thanks for your suggestion.

Borehole strain observation is the observation of crustal strain by installing strain sensors in boreholes, which has the advantages of high accuracy, wide bandwidth and strong anti-interference ability, and its observation data are widely used in the research of earthquake precursors and other aspects. Seismic signal is a typical non-stationary, non-linear time series data. Due to the complexity of the earth's structure, seismic signals are accompanied by various kinds of noise at the stages of generation, propagation and acquisition, and the band difference between the weak useful signals and the noise from the deep underground is very small and difficult to distinguish, and the extraction of effective microseismic signals from contaminated microseismic signals is a prerequisite for the subsequent analyses and researches, which will affect the final analysis of the whole seismic event.

There are many processing methods for seismic signals, including many common and effective methods. (Ma et al., 2011) used digital filtering techniques to study the body strain and barometric pressure data from Yixian station from 2002 to 2007, removed the long-period components in the raw data, and analysed the high-frequency spectral characteristics of the body strain with the fast Fourier transform. (Deng et al., 2015) used the Fourier transform to generate a spectral decomposition method for high-resolution seismic images based on information such as the frequency-amplitude spectrum of the signal, which was applied in the extraction of weak signals from deep reflection earthquakes. However, the Fourier transform is insufficient for non-smooth signals, and the Fourier transform-based filtering method for non-smooth signals will have problems such as signal distortion. (Zhang, 2018) used continuous wavelet

transform to analyse the time-frequency analysis of the strain data of the borehole at Guza, extracted the strain anomalies in the time-frequency spectra, and analysed the correlation between the strain anomalies and the anomalies of the seismic precursors. However, the wavelet transform has the problems of wavelet base selection, frequency domain overlap and threshold uncertainty, which is not suitable for analysing nonlinear smooth signals whose frequency varies with time, and is also not suitable for local analysis of signals. Unlike wavelet decomposition, EMD can represent the signal as an extension of basis functions which come directly from the signal itself, without defining the wavelet bases by itself, and the decomposition done is based on the intrinsic characteristics of the signal. The EMD method can smooth a non-smooth signal to obtain a series of components with different frequencies (IMFs), and by such a method a non-smooth, non-linear signal can be decomposed into smooth signals with different time scales (Lei et al., 2022). The Hilbert-Huang transform (HHT), which consists of EMD and Hilbert transform, is an adaptive signal processing method that performs modal decomposition based on the characteristics of the data itself, and it has clear physical significance for the processing of nonlinear smooth signals. (Yang et al., 2014) used HHT to analyse the marginal spectral features of the unexplained large tensile jumps recorded in the borehole body strain at the Qianling seismic station in February-June 2012, and judged that the main cause of this strain anomaly was a power supply problem. However, EMD also has drawbacks, such as the presence of mode aliasing, endpoint effects, and difficulty in determining the stopping conditions. In order to overcome these drawbacks, Konstantin Dragomiretskiy and Dominique Zosso proposed VMD (Dragomiretskiy and Zosso, 2014). VMD is a theoretically well-founded technique and is more resistant to sampling and noise compared to EMD. Compared with the recursive decomposition mode of EMD, VMD turns the signal decomposition into a variational decomposition mode, which is in essence a set of multiple adaptive Wiener filters, VMD can achieve adaptive segmentation of each component in the signal frequency domain, and is able to effectively overcome the pattern aliasing phenomenon generated in EMD decomposition, with stronger noise robustness and weaker endpoint effects than EMD. Therefore, the VMD method is suitable for analysing nonlinear nonsmooth signals such as step, glitch and burr. The VMD method has been widely used in fields such as geosciences, and the results of processing seismic signals are significantly better than the other signal processing methods mentioned above (Zhang et al., 2022; Rao et al., 2024; Liu et al., 2016; Li et al., 2018).

Deep learning is a branch of machine learning, which is a machine learning algorithm based on neural networks. Unlike traditional time-series analysis methods, deep learning can introduce more external information and is not limited to extrapolating data based on historical trends and seasonality. Deep learning can automatically learn features and patterns from raw data, and is able to learn multiple layers of abstract features. By increasing the number of layers in the neural network, more complex and abstract features can be learnt, leading to more accurate classification and prediction. For the GWN graph neural network we used, the use of dilated causal convolutional layers avoids the limitation of needing a large number of layers to process long time

sequences, enabling the model to effectively capture the dependencies of long time sequences; through the adjacency matrix, it is able to learn the hidden spatial dependencies through node embeddings; in contrast to recurrent neural network (RNN)-based models, the GWN convolutional network architecture allows for parallel computation, which solves the gradient vanishing/exploding problem of RNN when dealing with long time sequences.

### **Modification:**

A new paragraph was added to line 37 of the original manuscript: “There are many processing methods for seismic signals, including many common and effective methods. (Ma et al., 2011) used digital filtering techniques to study the body strain and barometric pressure data from Yixian station from 2002 to 2007, removed the long-period components in the raw data, and analysed the high-frequency spectral characteristics of the body strain with the fast Fourier transform. (Deng et al., 2015) used the Fourier transform to generate a spectral decomposition method for high-resolution seismic images based on the frequency-amplitude spectrum of the signal, which was applied in the extraction of weak signals from deep reflection earthquakes. (Zhang, 2018) used the continuous wavelet transform method to analyse the time-frequency analysis of the borehole strain data from Guza Station, extracted the strain anomalies in the time-frequency spectrum, and analysed the correlation between the strain anomalies and the seismic precursor anomalies. EMD method can smooth the non-smooth signals to obtain a series of components with different frequencies (IMF), by which the non-smooth, non-linear signals can be decomposed into smooth signals with different time scales (Lei et al., 2022). (Yang et al., 2014) used HHT to analyse the marginal spectral features of the unexplained large tensile jumps recorded in the borehole body strain at the Qianling seismic station in February-June 2012, and judged that the main cause of this strain anomaly was a power supply problem. However, EMD suffers from mode aliasing phenomenon, endpoint effect, and difficulty in determining the stopping condition. Compared with the recursive decomposition mode of EMD, VMD transforms the signal decomposition into a variational decomposition mode, which is essentially a set of multiple adaptive Wiener filters, and VMD can realise the adaptive segmentation of each component in the frequency domain of the signal, which can effectively overcome the mode aliasing phenomenon generated by EMD decomposition, and has a stronger noise robustness and a weaker end-point effect than EMD. Therefore, the VMD method is suitable for analysing nonlinear nonsmooth signals such as step, jumps and burr. The VMD method has been widely used in fields such as geosciences, and the results of processing seismic signals are significantly better than the other signal processing methods mentioned above (Zhang et al., 2022; Rao et al., 2024; Liu et al., 2016; Li et al., 2018)”.

### **Comment 2**

Furthermore, while you mention that VMD was used to pre-process the data by removing annual trends and tides, there is no explanation of how this pre-processing

specifically improves the performance of the GWN model. This gap makes it difficult to assess the necessity and effectiveness of VMD within your analysis pipeline. A more detailed description of the role and impact of VMD could help clarify its contribution to your results.

**Response:**

Thanks for your suggestion.

Our idea of using VMD to do data preprocessing is due to the presence of step, glitch and burr in the raw data, which are anomalous conditions due to the data monitoring process, and may override the real information of seismic signals that we need. (Chi et al., 2019) used VMD to do the processing of 1-month surface strain data. They decomposed  $S_a$  into five components and found that IMF1 is the trend term. They did the Fourier transform of IMF2 and found that the frequencies of the signal are mainly concentrated in  $f_1=1.157 \times 10^{-5}$  Hz and  $f_2=2.232 \times 10^{-5}$  Hz, which correspond to the semi-diurnal and diurnal wave frequencies of the Earth's tides, respectively. It is considered that IMF2 corresponds to the influence of the Earth's tides, and the IMF3-IMF5 components all contain a large amount of strain signals, and the remaining IMF3-IMF5 components are retained as the object of study. Thus the reason we chose VMD is not to improve the model performance, but only to remove the necessary influences.

**Comment 3**

In addition, while you report an increase in anomalous days 15-32 days prior to the earthquake, with a significant acceleration observed in the 20 days prior, the manuscript does not provide detailed statistical analyses or margins of error for these observations. Such information is crucial for understanding the robustness of your results. I suggest adding confidence intervals or error bars to make the reliability and statistical significance of your results clearer.

**Response:**

Thanks for your suggestion.

The VMD-GWN model we used uses a dual output based on upper and lower bounds at the output layer, and the output is a prediction interval which has nearly the same effect as the confidence intervals you mentioned, so our prediction results already come with a certain margin of error. However, as you said, Fig. 9 in the original manuscript does not indeed convey the reliability and statistical significance of the results in a completely clear way, so we have given the statistics of the anomaly rates. For the judgement condition of anomalous days in the original manuscript, it is only a judgement of whether each day is anomalous or not, and it is not clear the exact number of anomalies. Therefore, according to your suggestion, we made a count of the judgement results that met the conditions in each abnormal day, and took the statistical results as the number of abnormalities per day, and calculated the abnormal rate per day based on the number of abnormalities per day, and the statistical results of the abnormal rate per day are shown in Fig. 1 below.

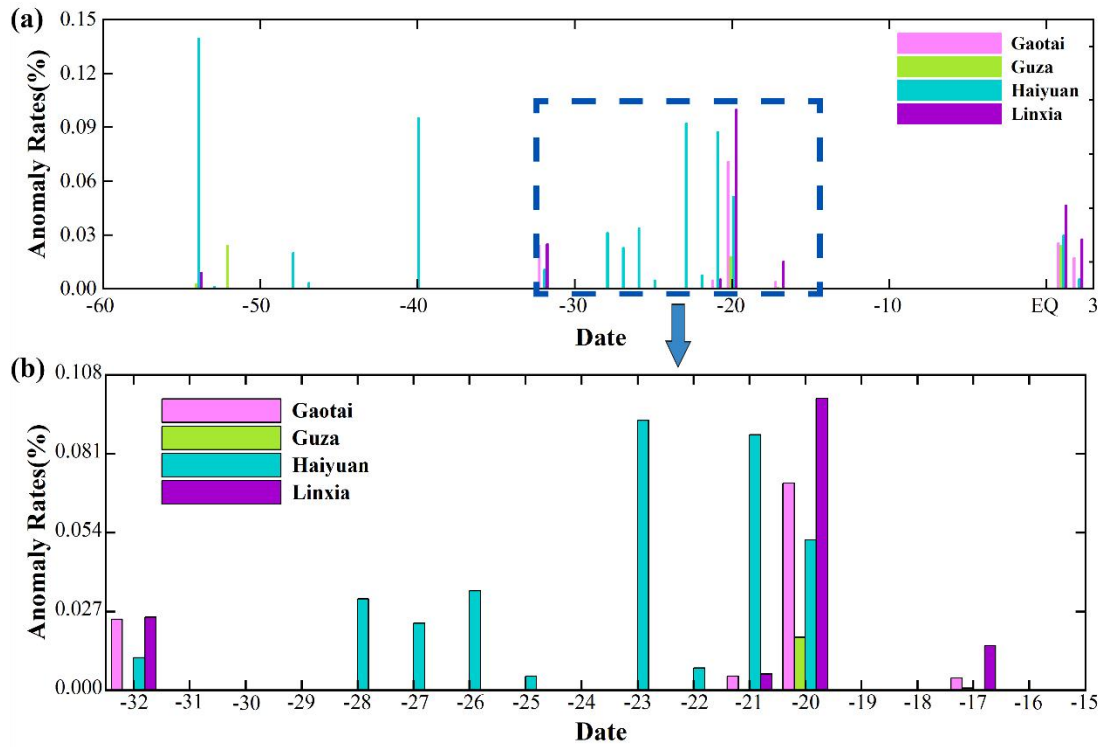

**Figure 1.** Daily anomaly rate statistics for four stations. Different coloured bars represent the daily anomaly rates of different stations. (a) Daily anomaly rate statistics from 62 days before to 3 days after the earthquake. (b) Daily anomaly rate statistics from 32 days before the earthquake to 15 days before the earthquake.

As shown in Fig. 1(a), in the time range from 60 days before the earthquake to 33 days before the earthquake, all four stations showed only a very small number of anomalies until 32 days before the earthquake, when anomalies appeared at a number of stations, and the anomalies also increased significantly, with Haiyuan station showing the most significant number of anomalies. The dashed box in Fig. 1(a) corresponds to the time period from 32 days before the earthquake to 15 days before the earthquake, and the details are shown in Fig. 1(b). We find that there are several stations with anomalies at the same time in the 32, 21, 20, and 17 days before the earthquake, among which all four stations have anomalies on the 20th day before the earthquake, and from the value of the anomaly rate, the anomaly rate on the 17th day before the earthquake has a very obvious decrease, so we believe that a turning point occurs on the 20th day before the earthquake, which corresponds to the time when the accelerating effect of the S-shape fitting is the most obvious. After the 17th day before the earthquake, there was a quiet period where no station detected anomalies until the earthquake occurred.

The combination of Fig.1 and Fig.9 in the original manuscript can more fully present the process of abnormal changes before the earthquake.

#### **Modification:**

Add a new paragraph after line 302: “For the judgement condition of abnormal days in the original manuscript, it is only a judgement of whether each day is abnormal or not, and it is not clear the specific number of abnormalities. Therefore, we made a count of the judgement results that met the conditions in each abnormal day, and took

the statistical result as the number of abnormalities per day, and calculated the abnormal rate per day based on the number of abnormalities per day, and the statistical result of the abnormal rate per day is shown in Fig. 10 below.

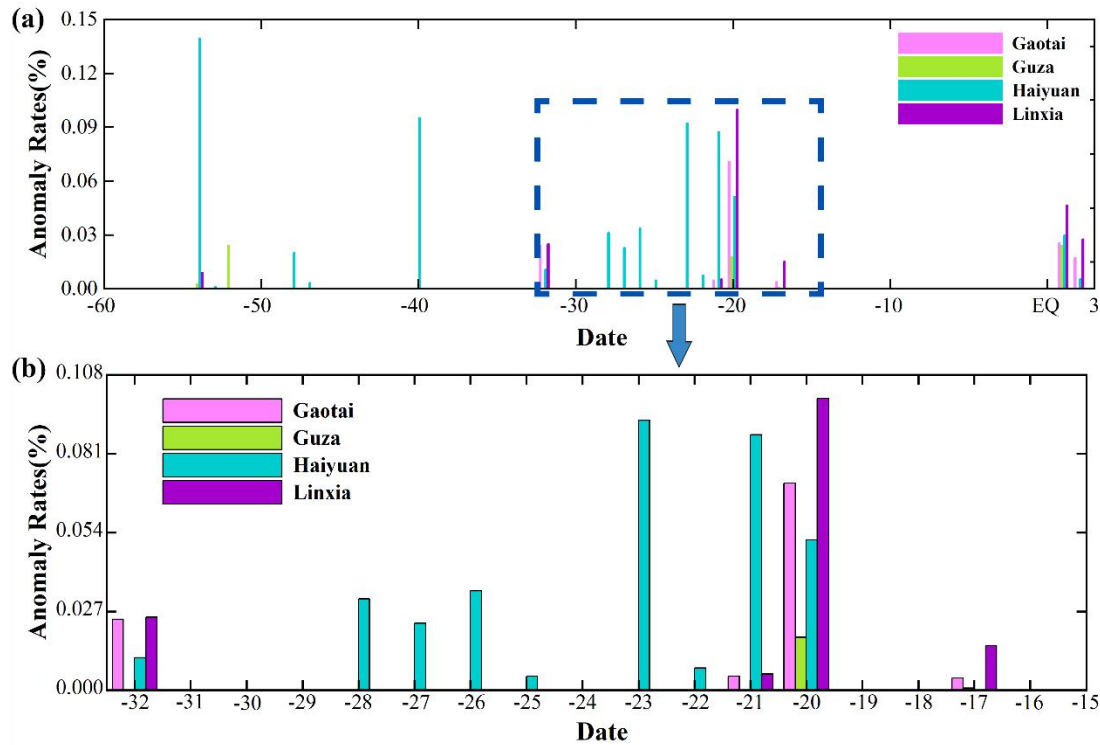

**Figure 10. Daily anomaly rate statistics for four stations. Different coloured bars represent the daily anomaly rates of different stations (a) Daily anomaly rate statistics from 62 days before to 3 days after the earthquake. (b) Daily anomaly rate statistics from 32 days before the earthquake to 15 days before the earthquake.**

As shown in Fig. 10(a), in the time range from 60 days before the earthquake to 33 days before the earthquake, all four stations showed only a very small number of anomalies until 32 days before the earthquake, when anomalies appeared at a number of stations, and the anomalies also increased significantly, with Haiyuan station showing the most significant number of anomalies. The dashed box in Fig. 10(a) corresponds to the time period from 32 days before the earthquake to 15 days before the earthquake, and the details are shown in Fig. 10(b). We find that there are several stations with anomalies at the same time in the 32, 21, 20, and 17 days before the earthquake, among which all four stations have anomalies on the 20th day before the earthquake, and from the value of the anomaly rate, the anomaly rate on the 17th day before the earthquake has a very obvious decrease, so we believe that a turning point occurs on the 20th day before the earthquake, which corresponds to the time when the accelerating effect of the S-shape fitting is the most obvious. After the 17th day before the earthquake, there was a quiet period where no station detected anomalies until the earthquake occurred. The combined analysis of Fig. 9 and Fig. 10 gives a fuller picture of the process of pre-seismic anomalous changes.”

#### Comment 4

I also noticed that you observed an increase in anomalous days one to three days after the earthquake and attributed this to aftershocks. While this observation is interesting, it seems to have little to do with the main focus of your study on earthquake prediction. It would be helpful to clarify how this post-seismic analysis relates to the main goal of earthquake prediction and to discuss its significance in the context of your overall results.

**Response:**

Thanks for your suggestion.

You are right to raise the point that the focus of our research is really not on post-earthquake analysis, so we have removed that part to ensure consistency of thought in the article.

**Modification:**

Lines 308-314 in the original manuscript were deleted: “(2) Anomalous days were also observed at all four stations on August 9 and 10 after the earthquake. Zhong et al., (2020) studied the IR anomalies and ionospheric anomalies in the same area before the Jiuzhaigou earthquake and found that the thermal radiation continued to increase until August 14, and the ionospheric anomalies were detected on August 11 and 15 after the earthquake. Xu et al., (2021) studied the ionospheric TEC anomalies of the Jiuzhaigou earthquake, and the anomalies were detected four days after the earthquake using different methods. The results of our study are consistent with current research, and anomalies were observed for several days after the earthquake. We believe that the post-earthquake anomalies were more likely due to the frequent occurrence of post-earthquake aftershocks.”.

**Comment 5**

In addition, the use of an S-shaped function to fit the cumulative results of anomalous days is mentioned, but the manuscript does not adequately explain why this particular fitting method was chosen or how it compares to other models. A more detailed discussion of this choice and the associated findings would improve the reader’s understanding of your analytical approach.

**Response:**

Thanks for your suggestion.

(Bufe and Varnes, 1993) and (Bufe et al., 1994) found that the clustering of intermediate events prior to a large shock leads to a regional increase in the cumulative Benioff strain  $\varepsilon(t)$ , which can be fitted by a power-law time-destruction relationship:

$$\varepsilon(t) = A + B(t_f - t)^m \quad (1)$$

where  $A$  and  $B$  are constants,  $0 < m < 1$  is a constant for adjusting the power law, and  $t_f$  is the predicted mainshock time, i.e., the critical point in time at which the process of accelerating cumulative Benioff strain (cumulative energy) takes place. This behaviour has been interpreted as a critical process prior to the movement of a

large earthquake towards a critical point (i.e., the mainshock). (Bufe and Varnes, 1993) justified Equation 1 using a simple damage mechanics model.

(De Santis, 2014) studied the 2009 L'Aquila and 2012 Emilia earthquakes based on earthquake catalogues. Equation 2 is an inverse diffusion equation for the spatial proximity of seismic events to the epicentre and is used to fit the distribution of seismic distances over time within 200 km of the epicentre region:

$$r(t) = D_r \cdot (t_f - t)^{m_2}$$

(2)

where  $D_r$  and  $m_2$  are constants and  $t_f$  represents the critical point in space at which seismic events are focused. Equation 3 fits the distribution of the time interval between seismic events  $\tau(t)$  over time:

$$\tau(t) = D_\tau \cdot (t_f - t)^{m_3} \quad (3)$$

where  $D_\tau$  and  $m_3$  are constants and  $t_f$  represents the critical point in time at which seismic events are focused.

Equation 2 and Equation 3 specifically show the manifestation of this energy accumulation in space and time, and this process in time and space is known as the spatio-temporal focussing phenomenon before the mainshock. The research idea of this paper is the extraction of multi-station pre-seismic anomalies based on spatio-temporal features, and the fitting method proposed above has good results in spatio-temporal and this fitting method has theoretical support and physical significance, so for the anomalous results in our original manuscript, the fitting is done by using the S-type function. De Santis et al., (2017) used Swarm magnetosatellite data to study the 2015 Nepal earthquake and proposed an S-shaped fitting function in anomalous cumulative analysis; they found that S-shaped fitting was significantly superior to linear fitting.

#### **Modification:**

Add a new paragraph on line 276: “(Bufe and Varnes, 1993) and (Bufe et al., 1994) found that the clustering of intermediate events prior to a large shock leads to a regional increase in the cumulative Benioff strain  $\varepsilon(t)$ , which can be fitted by a power-law time-destruction relationship:

$$\varepsilon(t) = A + B(t_f - t)^m \quad (10)$$

where  $A$  and  $B$  are constants,  $0 < m < 1$  is a constant for adjusting the power law,  $t_f$  is the predicted time of the mainshock, i.e., the critical point in time for the

acceleration process of the cumulative Benioff strain (cumulative energy). This behaviour has been interpreted as a critical process preceding the movement of a large earthquake towards a critical point (i.e., the mainshock). (Bufe and Varnes, 1993) justify Equation 1 with a simple model of damage mechanics. (De Santis, 2014) studied the 2009 L'Aquila and 2012 Emilia earthquakes based on seismic catalogues, showing concretely how this accumulation of energy in space and time manifestations. The research idea of this paper is the extraction of multi-station pre-earthquake



anomalies based on spatio-temporal features, and the fitting method proposed above has good results in spatio-temporal and this fitting method has theoretical support and physical significance, so for the anomalous results in our original manuscript, we use the S-type function to do the fitting.”

#### **Comment 6**

Finally, the manuscript suggests that the pre-earthquake anomalies are due to strain energy diffusion near the epicentre. This claim appears to have been made without a solid empirical or theoretical basis in the text. It would be beneficial if you could provide additional evidence or references to support this assumption or discuss alternative explanations for the observed anomalies.

#### **Response:**

Thanks for your suggestion.

Add a new paragraph before line 302:“(Zhang et al., 2018) analysed the temporal and spatial evolution characteristics of the precursor anomalies of the Jiuzhaigou earthquake, and found that the short-term phases of the precursor anomalies of the Jiuzhaigou earthquake are divided into two phases,  $\gamma_1$  and  $\gamma_2$ , among which the anomalies in the  $\gamma_2$  phase are deformation anomalies, which are manifested as the expansion of anomalies from the near-source area to the outside of the epicentre. (Wang et al., 1984) found that the extension of precursor anomalies to the periphery of the epicentre was due to the subcritical extension of cracks, and justified their conclusions based on the inversion results of the precursor observations of resistivity. (Guo et al., 2020) analysed the deformation process in the unstable state of a fault and defined the meta-stable (or sub-stable) state of a fault as the transition stage from peak stress to fast destabilising critical stress throughout the slow loading and fast unloading. At this stage, the accumulated strain energy starts to be released.”.

#### **Comment 7**

The manuscript is generally well written, but there are some areas where the English could be improved (e.g., "This unique geographic location makes earthquakes a common occurrence"). Also, some typographical errors need to be corrected (e.g., "sevesral" and "pro-seismic"). The figures, especially Figures 3, 4 and 7, are too small and difficult to read, which makes them difficult to understand.

I hope that these comments will be helpful in revising your manuscript. Clarifying these points will not only strengthen the scientific rigour of your study, but will also make your results more accessible and meaningful to the research community.

Best regards.

#### **Response:**

Thanks for your suggestion.

Line 59-61. Modified “The Sichuan Basin is located at the junction of the

Asia-Europe Plate and the Indian Ocean Plate, and is influenced by neighboring mountain ranges and plateaus, forming several fracture zones. This unique geographic location makes earthquakes a frequent event (Zhang, 2023). ” It is modified to “The Sichuan Basin is at the junction of the Asia-Europe Plate and the Indian Ocean Plate, and is influenced by the neighbouring mountain ranges and plateaus, forming several fracture zones, and its unique geographic location has led to frequent earthquakes within Sichuan(Zhang, 2023). ”.

Line 60. Modified “several”. It is modified to “several”.

Line 16. Modified “pro-seismic”. It is modified to “pre-seismic”.

Modifications were made to Figures 3, 4 and 7 in the original manuscript. The results of the modifications are shown below:

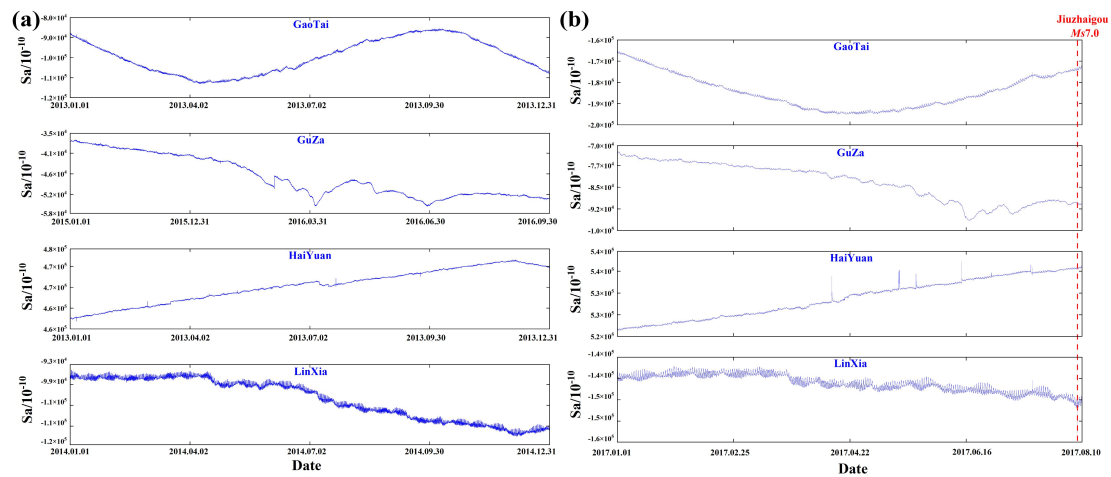

**Figure 3: Data sets of  $S_a$  components for Linxia, Guza, Haiyuan, and Gaotai stations. (a)  $S_a$  component data of each station for training dataset; (b)  $S_a$  component data of each station for test dataset. Red dotted line indicates time of Jiuzhaigou earthquake.**

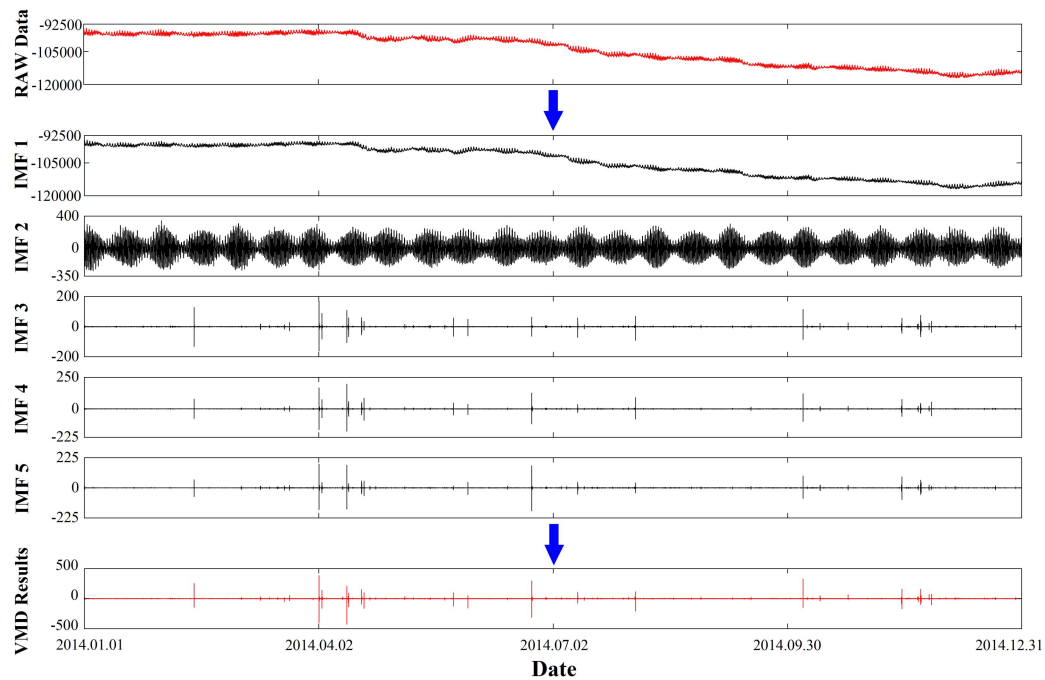

**Figure 4: Plot of decomposition results of  $S_a$  data using VMD method at Linxia station.**

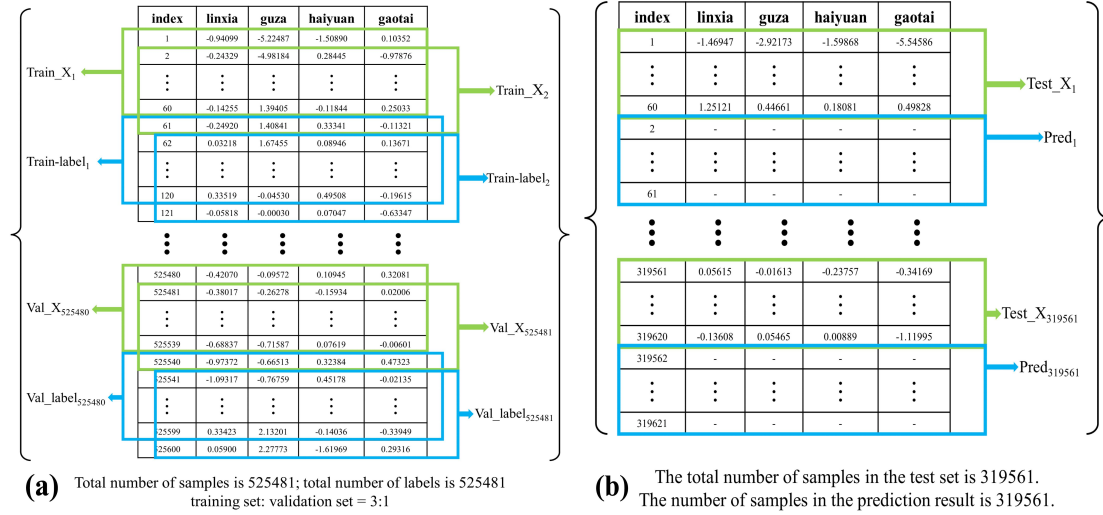

**Figure 7: Plot of data sliced to form samples and labels. (a) Data plot of samples and labels obtained from slicing the training dataset. Green box represents generated sample data; blue box represents generated label data. (b) Data graph of sample data and predicted result shapes based on test dataset slices. Green box represents sample data; blue box represents predicted result shape.**

## References

- Bufe, C. G. and Varnes, D. J.: PREDICTIVE MODELING OF THE SEISMIC CYCLE OF THE GREATER SAN-FRANCISCO BAY-REGION, JOURNAL OF GEOPHYSICAL RESEARCH-SOLID EARTH, 98, 9871-9883, 10.1029/93JB00357, 1993.
- Bufe, C. G., Nishenko, S. P., and Varnes, D. J.: SEISMICITY TRENDS AND POTENTIAL FOR LARGE EARTHQUAKES IN THE ALASKA-ALEUTIAN REGION, PURE AND APPLIED GEOPHYSICS, 142, 83-99, 10.1007/BF00875969, 1994.
- Chi, C., Zhu, K., Yu, Z., Fan, M., Li, K., and Sun, H.: Detecting Earthquake-Related Borehole Strain Data Anomalies With Variational Mode Decomposition and Principal Component Analysis: A Case Study of the Wenchuan Earthquake, IEEE Access, 7, 157997-158006, 10.1109/access.2019.2950011, 2019.
- De Santis, A.: Geosystemics, Entropy and Criticality of Earthquakes: A Vision of Our Planet and a Key of Access, NONLINEAR PHENOMENA IN COMPLEX SYSTEMS: FROM NANO TO MACRO SCALE, WOS:000345122100001, 10.1007/978-94-017-8704-8\_1, 2014.
- De Santis, A., Balasis, G., Pavón-Carrasco, F. J., Cianchini, G., and Manda, M.: Potential earthquake precursory pattern from space: The 2015 Nepal event as seen by magnetic Swarm satellites, Earth and Planetary Science Letters, 461, 119-126, 10.1016/j.epsl.2016.12.037, 2017.
- Deng, G., Liang, F., Li, X., Zhao, J., Liu, H., and Wang, X.: S-transform spectrum decomposition technique in the application of the extraction of weak seismic signals, CHINESE JOURNAL OF GEOPHYSICS, 58, 4594-4604, 2015.

Dragomiretskiy, K. and Zosso, D.: Variational Mode Decomposition, *IEEE Transactions on Signal Processing*, 62, 531-544, 10.1109/tsp.2013.2288675, 2014.

Guo, Y., Zhuo, Y., Liu, P., Chen, S., and Ma, J.: Experimental Study of Observable Deformation Process in Fault Meta-Instability State before Earthquake Generation, *Geodynamics & Tectonophysics*, 11, 417-430, 10.5800/gt-2020-11-2-0483, 2020.

Lei, Q., Zhai, S., Mao, Y., and Zhu, Z.: Analysis and research on baicheng Ms5.4 earthquake based on Hilbert-Huang transform, *INLAND EARTHQUAKE*, 36, 265-272, 10.16256/j.issn.1001-8956.2022.03.009, 2022.

Li, F., Zhang, B., Verma, S., and Marfurt, K. J.: Seismic signal denoising using thresholded variational mode decomposition, *Exploration Geophysics*, 49, 450-461, 10.1071/eg17004, 2018.

Liu, Y., Yang, G., Li, M., and Yin, H.: Variational mode decomposition denoising combined the detrended fluctuation analysis, *Signal Processing*, 125, 349-364, 10.1016/j.sigpro.2016.02.011, 2016.

Ma, D., Niu, A., Yuan, S., Wang, X., and Wang, L.: Analysis on the influence of short-term atmospheric pressure fluctuation on body strain data based on spectrum characteristics, *INLAND EARTHQUAKE*, 25, 255-262, 10.16256/j.issn.1001-8956.2011.03.010, 2011.

Rao, D., Huang, M., Shi, X., Yu, Z., and He, Z.: A Microseismic Signal Denoising Algorithm Combining VMD and Wavelet Threshold Denoising Optimized by BWOA, *Computer Modeling in Engineering & Sciences*, 141, 187-217, 10.32604/cmescs.2024.051402, 2024.

Wang, X., Qi, G., and Zhao, Y.: Propagation before fault instability and resistivity precursor, *Scientia Sinica(Chimica)*, 1026-1038, 1984.

Yang, X., Liu, C., He, B., Dou, M., Wang, D., and Zhang, L.: Analyzing the anomaly of the extensional strain steps recorded by borehole dilatometer at Qianling Seismic Station, *SEISMOLOGICAL AND GEOMAGNETIC OBSERVATION AND RESEARCH*, 35, 159-164, 2014.

Zhang, W.: Analysis of borehole strain earthquake precursory observation data based on Wavelet Transform, bachelor's degree, Jilin University, 2018.

Zhang, X., Song, Z., and Li, G.: Temporal and Spatial Evolution of Precursory Anomalies of the Jiuzhaigou Ms7.0 Earthquake and its Analysis, *EARTHQUAKE RESEARCH IN CHINA*, 34, 772-780, 2018.

Zhang, X., Cao, L., Chen, Y., Jia, R., and Lu, X.: Microseismic signal denoising by combining variational mode decomposition with permutation entropy, *Applied Geophysics*, 19, 65-80, 10.1007/s11770-022-0926-6, 2022.
